# Supplementary material
Source: MDPI journal article supplement (https://www.mdpi.com/2075-5309/11/3/87)
Supplement: s1 [file s1]

# The public role for the effectiveness of the territorial enhancement initiatives: a case study on the redevelopment of a building in disuse in an Italian small town

Pierluigi Morano <sup>1</sup>, Francesco Tajani <sup>2</sup>, Felicia Di Liddo <sup>1,\*</sup> Paola Amoruso <sup>3</sup>

<sup>1</sup> Department of Sciences of Civil Engineering and Architecture, Polytechnic University of Bari, Via Orabona 4, 70125 Bari, Italy; pierluigi.morano@poliba.it; felicia.diliddo@poliba.it

<sup>2</sup> Department of Architecture and Design, Sapienza University of Rome, Via Flaminia 359, 00196 Rome, Italy; francesco.tajani@uniroma1.it

<sup>3</sup> Department of Economics and Management, LUM Giuseppe Degennaro University, Strada Statale 100 km 18, 70010 Casamassima (BA), Italy; amoruso@lum.it

\* Correspondence: felicia.diliddo@poliba.it

**Citation:** Morano, P.; Tajani, F.; Di Liddo, F.; Amoruso, P. The Public Role for the Effectiveness of the Territorial Enhancement Initiatives: A Case Study on the Redevelopment of a Building in Disuse in an Italian Small Town. *Buildings* **2021**, *11*, 87. <https://doi.org/10.3390/buildings11030087>

Academic Editors: Paula López-Arce and Ainara Zornoza-Indart

Received: 4 January 2021

Accepted: 23 February 2021

Published: 27 February 2021

**Publisher's Note:** MDPI stays neutral with regard to jurisdictional claims in published maps and institutional affiliations.

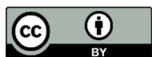

**Copyright:** © 2021 by the authors. Licensee MDPI, Basel, Switzerland. This article is an open access article distributed under the terms and conditions of the Creative Commons Attribution (CC BY) license (<http://creativecommons.org/licenses/by/4.0/>).

|                                                          | PREPAR.<br>PHASE    | CONSTRUCTION<br>PHASE |                    | DEVELOPMENT PHASE |                   |                   |                   |                   | FULLY OPERATIONAL PHASE |                   |                   |                   |                   |                   |                   |                   |                   |
|----------------------------------------------------------|---------------------|-----------------------|--------------------|-------------------|-------------------|-------------------|-------------------|-------------------|-------------------------|-------------------|-------------------|-------------------|-------------------|-------------------|-------------------|-------------------|-------------------|
| YEAR                                                     | 1                   | 2                     | 3                  | 4                 | 5                 | 6                 | 7                 | 8                 | 9                       | 10                | 11                | 12                | 13                | 14                | 15                | 16                | 17...30           |
| <b>INVESTMENT COSTS [€]</b>                              |                     |                       |                    |                   |                   |                   |                   |                   |                         |                   |                   |                   |                   |                   |                   |                   |                   |
| <i>Renovation of the existing building</i>               |                     | 119,230.95            | 119,230.95         |                   |                   |                   |                   |                   |                         |                   |                   |                   |                   |                   |                   |                   |                   |
| <i>Redevelopment of the green area</i>                   |                     | 2,296.80              | 2,296.80           |                   |                   |                   |                   |                   |                         |                   |                   |                   |                   |                   |                   |                   |                   |
| <i>Realization of the new building</i>                   |                     | 111,697.34            | 111,697.34         |                   |                   |                   |                   |                   |                         |                   |                   |                   |                   |                   |                   |                   |                   |
| <i>Technical costs</i>                                   | 46,645.02           |                       |                    |                   |                   |                   |                   |                   |                         |                   |                   |                   |                   |                   |                   |                   |                   |
| <i>General expenses</i>                                  | 23,322.51           |                       |                    |                   |                   |                   |                   |                   |                         |                   |                   |                   |                   |                   |                   |                   |                   |
| <i>Financial charges</i>                                 | 39,299.62           | 39,299.62             | 39,299.62          | 39,299.62         | 39,299.62         | 39,299.62         | 39,299.62         | 39,299.62         | 39,299.62               | 39,299.62         |                   |                   |                   |                   |                   |                   |                   |
| <b>TOTAL [€]</b>                                         | <b>109,267.14</b>   | <b>272,524.71</b>     | <b>272,524.71</b>  | <b>39,299.62</b>  | <b>39,299.62</b>  | <b>39,299.62</b>  | <b>39,299.62</b>  | <b>39,299.62</b>  | <b>39,299.62</b>        | <b>39,299.62</b>  |                   |                   |                   |                   |                   |                   |                   |
| <b>MANAGEMENT COSTS [€]</b>                              |                     |                       |                    |                   |                   |                   |                   |                   |                         |                   |                   |                   |                   |                   |                   |                   |                   |
| <i>Insurance</i>                                         |                     |                       |                    | 777.42            | 777.42            | 777.42            | 777.42            | 777.42            | 777.42                  | 777.42            | 777.42            | 777.42            | 777.42            | 777.42            | 777.42            | 777.42            | 777.42            |
| <i>Provision for extraordinary expenditure</i>           |                     |                       |                    | 3,887.08          | 3,887.08          | 3,887.08          | 3,887.08          | 3,887.08          | 3,887.08                | 3,887.08          | 3,887.08          | 3,887.08          | 3,887.08          | 3,887.08          | 3,887.08          | 3,887.08          | 3,887.08          |
| <i>Staff salaries</i>                                    |                     |                       |                    | 27,300.00         | 54,600.00         | 81,900.00         | 109,200.00        | 122,850.00        | 136,500.00              | 136,500.00        | 136,500.00        | 136,500.00        | 136,500.00        | 136,500.00        | 136,500.00        | 136,500.00        | 136,500.00        |
| <i>Utilities services and raw materials purchase</i>     |                     |                       |                    | 6,534.26          | 13,068.52         | 19,602.78         | 26,137.04         | 29,404.17         | 32,671.30               | 32,671.30         | 32,671.30         | 32,671.30         | 32,671.30         | 32,671.30         | 32,671.30         | 32,671.30         | 32,671.30         |
| <b>TOTAL [€]</b>                                         |                     |                       |                    | <b>38,498.76</b>  | <b>72,333.02</b>  | <b>106,167.28</b> | <b>140,001.54</b> | <b>156,918.67</b> | <b>173,835.80</b>       | <b>173,835.80</b> | <b>173,835.80</b> | <b>173,835.80</b> | <b>173,835.80</b> | <b>173,835.80</b> | <b>173,835.80</b> | <b>173,835.80</b> | <b>173,835.80</b> |
| <b>TOTAL COSTS [€]</b>                                   | <b>109,267.14</b>   | <b>272,524.71</b>     | <b>272,524.71</b>  | <b>77,798.38</b>  | <b>111,632.64</b> | <b>145,466.90</b> | <b>179,301.15</b> | <b>196,218.28</b> | <b>213,135.41</b>       | <b>213,135.41</b> | <b>173,835.80</b> |
| <b>REVENUES [€]</b>                                      |                     |                       |                    |                   |                   |                   |                   |                   |                         |                   |                   |                   |                   |                   |                   |                   |                   |
| <i>Total annual rates paid by the nursing home users</i> |                     |                       |                    | 54,452.16         | 108,904.32        | 163,356.48        | 217,808.64        | 245,034.72        | 272,260.80              | 272,260.80        | 272,260.80        | 272,260.80        | 272,260.80        | 272,260.80        | 272,260.80        | 272,260.80        | 272,260.80        |
| <b>TOTAL REVENUES [€]</b>                                |                     |                       |                    | <b>54,452.16</b>  | <b>108,904.32</b> | <b>163,356.48</b> | <b>217,808.64</b> | <b>245,034.72</b> | <b>272,260.80</b>       | <b>272,260.80</b> | <b>272,260.80</b> | <b>272,260.80</b> | <b>272,260.80</b> | <b>272,260.80</b> | <b>272,260.80</b> | <b>272,260.80</b> | <b>272,260.80</b> |
| <b>CASH-FLOW [€]</b>                                     | <b>-109,267.14</b>  | <b>-272,524.71</b>    | <b>-272,524.71</b> | <b>-23,346.22</b> | <b>-2,728.32</b>  | <b>17,889.58</b>  | <b>38,507.49</b>  | <b>48,816.44</b>  | <b>59,125.39</b>        | <b>59,125.39</b>  | <b>98,425.00</b>  |
| <b>NPV [€]</b>                                           | <b>-€ 39,609.63</b> |                       |                    |                   |                   |                   |                   |                   |                         |                   |                   |                   |                   |                   |                   |                   |                   |
| <b>IRR [%]</b>                                           | <b>7.92%</b>        |                       |                    |                   |                   |                   |                   |                   |                         |                   |                   |                   |                   |                   |                   |                   |                   |

Table S1. Development of the DCFA for the case study in the situation 1

|                                                          | PREPAR.<br>PHASE   | CONSTRUCTION<br>PHASE |                    | DEVELOPMENT PHASE |                   |                   |                   |                   | FULLY OPERATIONAL PHASE |                   |                   |                   |                   |                   |                   |                   |                   |
|----------------------------------------------------------|--------------------|-----------------------|--------------------|-------------------|-------------------|-------------------|-------------------|-------------------|-------------------------|-------------------|-------------------|-------------------|-------------------|-------------------|-------------------|-------------------|-------------------|
| YEAR                                                     | 1                  | 2                     | 3                  | 4                 | 5                 | 6                 | 7                 | 8                 | 9                       | 10                | 11                | 12                | 13                | 14                | 15                | 16                | 17...30           |
| <b>INVESTMENT COSTS [€]</b>                              |                    |                       |                    |                   |                   |                   |                   |                   |                         |                   |                   |                   |                   |                   |                   |                   |                   |
| <i>Renovation of the existing building</i>               |                    | 119,230.95            | 119,230.95         |                   |                   |                   |                   |                   |                         |                   |                   |                   |                   |                   |                   |                   |                   |
| <i>Redevelopment of the green area</i>                   |                    | 2,296.80              | 2,296.80           |                   |                   |                   |                   |                   |                         |                   |                   |                   |                   |                   |                   |                   |                   |
| <i>Realization of the new building</i>                   |                    | 111,697.34            | 111,697.34         |                   |                   |                   |                   |                   |                         |                   |                   |                   |                   |                   |                   |                   |                   |
| <i>Technical costs</i>                                   | 46,645.02          |                       |                    |                   |                   |                   |                   |                   |                         |                   |                   |                   |                   |                   |                   |                   |                   |
| <i>General expenses</i>                                  | 23,322.51          |                       |                    |                   |                   |                   |                   |                   |                         |                   |                   |                   |                   |                   |                   |                   |                   |
| <i>Financial charges</i>                                 | 39,299.62          | 39,299.62             | 39,299.62          | 39,299.62         | 39,299.62         | 39,299.62         | 39,299.62         | 39,299.62         | 39,299.62               | 39,299.62         |                   |                   |                   |                   |                   |                   |                   |
| <b>TOTAL [€]</b>                                         | <b>109,267.14</b>  | <b>272,524.71</b>     | <b>272,524.71</b>  | <b>39,299.62</b>  | <b>39,299.62</b>  | <b>39,299.62</b>  | <b>39,299.62</b>  | <b>39,299.62</b>  | <b>39,299.62</b>        | <b>39,299.62</b>  |                   |                   |                   |                   |                   |                   |                   |
| <b>MANAGEMENT COSTS [€]</b>                              |                    |                       |                    |                   |                   |                   |                   |                   |                         |                   |                   |                   |                   |                   |                   |                   |                   |
| <i>Insurance</i>                                         |                    |                       |                    | 777.42            | 777.42            | 777.42            | 777.42            | 777.42            | 777.42                  | 777.42            | 777.42            | 777.42            | 777.42            | 777.42            | 777.42            | 777.42            | 777.42            |
| <i>Provision for extraordinary expenditure</i>           |                    |                       |                    | 3,887.08          | 3,887.08          | 3,887.08          | 3,887.08          | 3,887.08          | 3,887.08                | 3,887.08          | 3,887.08          | 3,887.08          | 3,887.08          | 3,887.08          | 3,887.08          | 3,887.08          | 3,887.08          |
| <i>Staff salaries</i>                                    |                    |                       |                    | 27,300.00         | 54,600.00         | 81,900.00         | 109,200.00        | 122,850.00        | 136,500.00              | 136,500.00        | 136,500.00        | 136,500.00        | 136,500.00        | 136,500.00        | 136,500.00        | 136,500.00        | 136,500.00        |
| <i>Utilities services and raw materials purchase</i>     |                    |                       |                    | 6,534.26          | 13,068.52         | 19,602.78         | 26,137.04         | 29,404.17         | 32,671.30               | 32,671.30         | 32,671.30         | 32,671.30         | 32,671.30         | 32,671.30         | 32,671.30         | 32,671.30         | 32,671.30         |
| <b>TOTAL [€]</b>                                         |                    |                       |                    | <b>38,498.76</b>  | <b>72,333.02</b>  | <b>106,167.28</b> | <b>140,001.54</b> | <b>156,918.67</b> | <b>173,835.80</b>       | <b>173,835.80</b> | <b>173,835.80</b> | <b>173,835.80</b> | <b>173,835.80</b> | <b>173,835.80</b> | <b>173,835.80</b> | <b>173,835.80</b> | <b>173,835.80</b> |
| <b>TOTAL COSTS [€]</b>                                   | <b>109,267.14</b>  | <b>272,524.71</b>     | <b>272,524.71</b>  | <b>77,798.38</b>  | <b>111,632.64</b> | <b>145,466.90</b> | <b>179,301.15</b> | <b>196,218.28</b> | <b>213,135.41</b>       | <b>213,135.41</b> | <b>173,835.80</b> |
| <b>REVENUES [€]</b>                                      |                    |                       |                    |                   |                   |                   |                   |                   |                         |                   |                   |                   |                   |                   |                   |                   |                   |
| <i>Total annual rates paid by the nursing home users</i> |                    |                       |                    | 54,452.16         | 108,904.32        | 163,356.48        | 217,808.64        | 245,034.72        | 272,260.80              | 272,260.80        | 272,260.80        | 272,260.80        | 272,260.80        | 272,260.80        | 272,260.80        | 272,260.80        | 272,260.80        |
| <i>Periodic fee</i>                                      | 875.69             | 1,751.38              | 2,627.07           | 3,502.76          | 4,378.44          | 4,378.44          | 4,378.44          | 4,378.44          | 4,378.44                | 4,378.44          | 4,378.44          | 4,378.44          | 4,378.44          | 4,378.44          | 4,378.44          | 4,378.44          | 4,378.44          |
| <b>TOTAL REVENUES [€]</b>                                | <b>875.69</b>      | <b>1,751.38</b>       | <b>2,627.07</b>    | <b>57,954.92</b>  | <b>113,282.76</b> | <b>167,734.92</b> | <b>222,187.08</b> | <b>249,413.16</b> | <b>276,639.24</b>       | <b>276,639.24</b> | <b>276,639.24</b> | <b>276,639.24</b> | <b>276,639.24</b> | <b>276,639.24</b> | <b>276,639.24</b> | <b>276,639.24</b> | <b>276,639.24</b> |
| <b>CASH-FLOW [€]</b>                                     | <b>-108,391.45</b> | <b>-270,773.33</b>    | <b>-269,897.64</b> | <b>-19,843.46</b> | <b>1,650.13</b>   | <b>22,268.03</b>  | <b>42,885.93</b>  | <b>53,194.88</b>  | <b>63,503.83</b>        | <b>63,503.83</b>  | <b>102,803.45</b> |
| <b>NPV [€]</b>                                           | <b>0.00</b>        |                       |                    |                   |                   |                   |                   |                   |                         |                   |                   |                   |                   |                   |                   |                   |                   |
| <b>IRR [%]</b>                                           | <b>8.50%</b>       |                       |                    |                   |                   |                   |                   |                   |                         |                   |                   |                   |                   |                   |                   |                   |                   |

**Table S2.** Development of the DCFA for the case study in the situation 2
